# Supplementary material for: Green light-excitable naphthalenediimide acetylide-containing cyclometalated Ir(iii) complex with long-lived triplet excited states as triplet photosensitizers for triplet–triplet annihilation upconversion
Source: Royal Society of Chemistry journal article supplement (doi:10.1039/c3dt32815e), 2013-01-01
Supplement: c3dt32815e.pdf [file c3dt32815e.pdf]

**Electronic Supplementary Information for:**

**Green light-excitable naphthalenediimide acetylide-containing cyclometalated  
Ir(III) complex with long-lived triplet excited states as triplet photosensitizer for  
triplet-triplet annihilation upconversion**

*Lihua Ma, Song Guo, Jifu Sun, Caishun Zhang, Jianzhang Zhao\* and Huimin Guo\**

State Key Laboratory of Fine Chemicals, School of Chemical Engineering, Dalian University of Technology, E-208 West

Campus, 2 Ling-Gong Road, Dalian 116012, P. R. China.

zhaojzh@dlut.edu.cn (J.Z.), guohm@dlut.edu.cn (H.G.);

web: <http://finechem.dlut.edu.cn/photochem>

|                                                        |     |
|--------------------------------------------------------|-----|
| 1. NMR and HR-MS spectra ... ..                        | S2  |
| 2. Calculation details ... ..                          | S8  |
| 3. The emission spectra in 77 K and RT ... ..          | S12 |
| 4. The UV-vis absorption and excitation spectra ... .. | S13 |
| 5. Z-matrix details ... ..                             | S14 |

### 1. NMR and HR-MS spectra

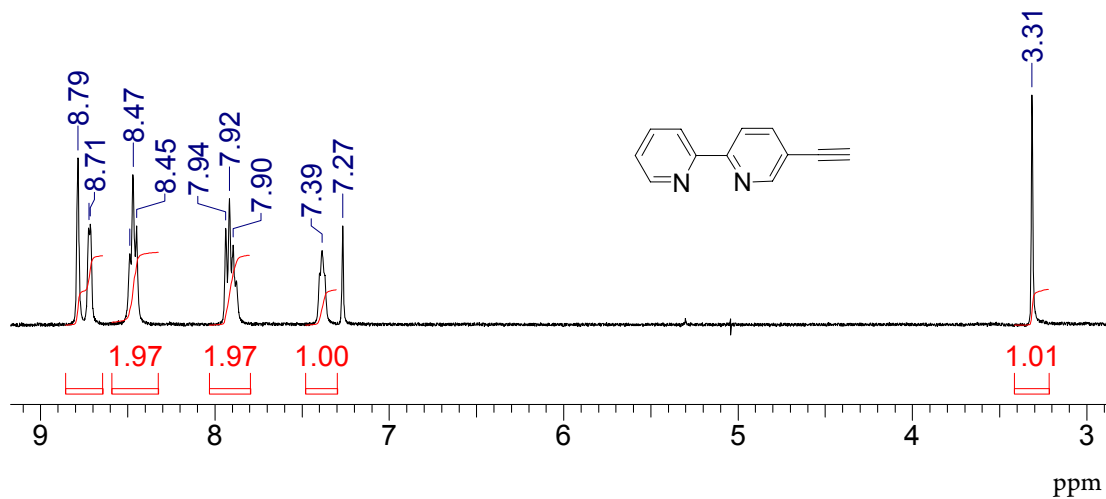

Fig. S1  $^1\text{H}$  NMR of 4 (400 MHz,  $\text{CDCl}_3$ ).

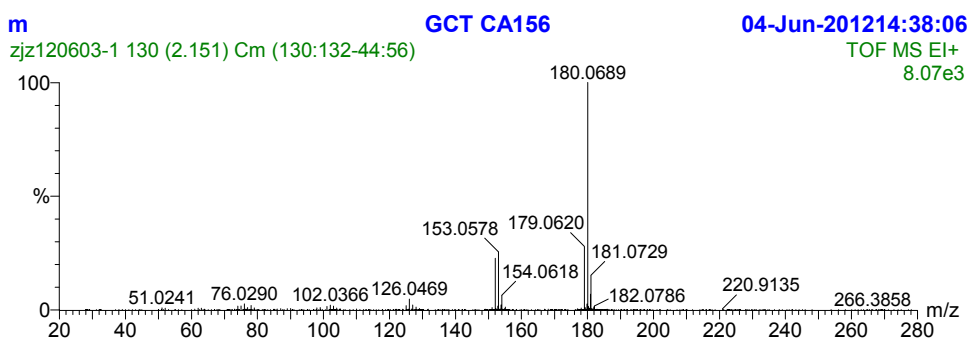

Fig. S2 TOF HRMS ESI of 4.

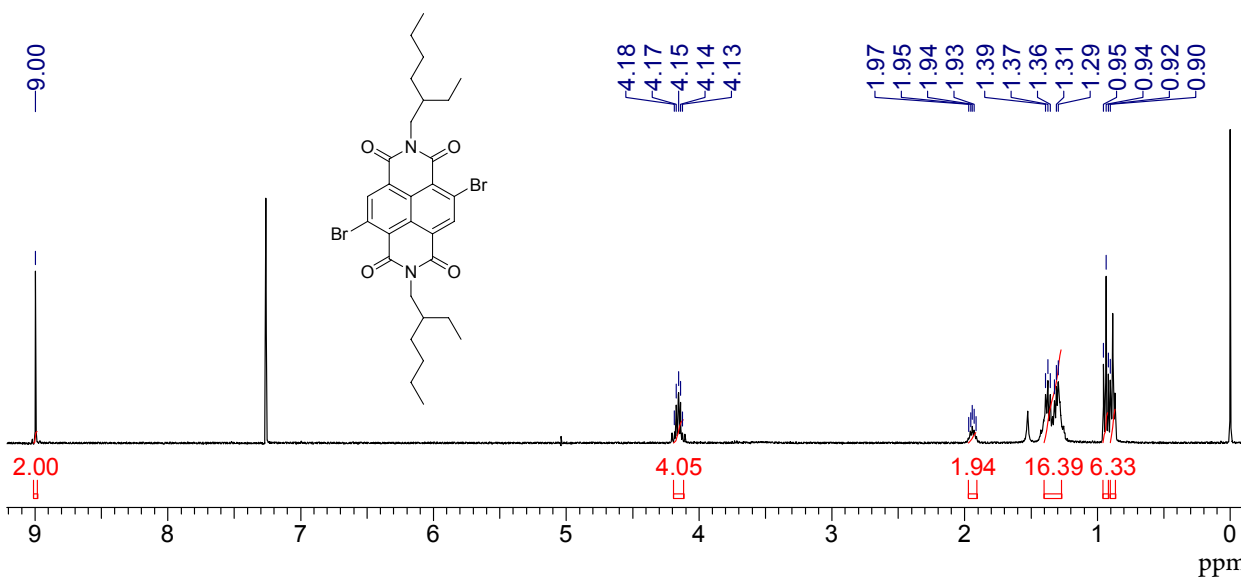

Fig. S3  $^1\text{H}$  NMR of 7 (400 MHz,  $\text{CDCl}_3$ ).

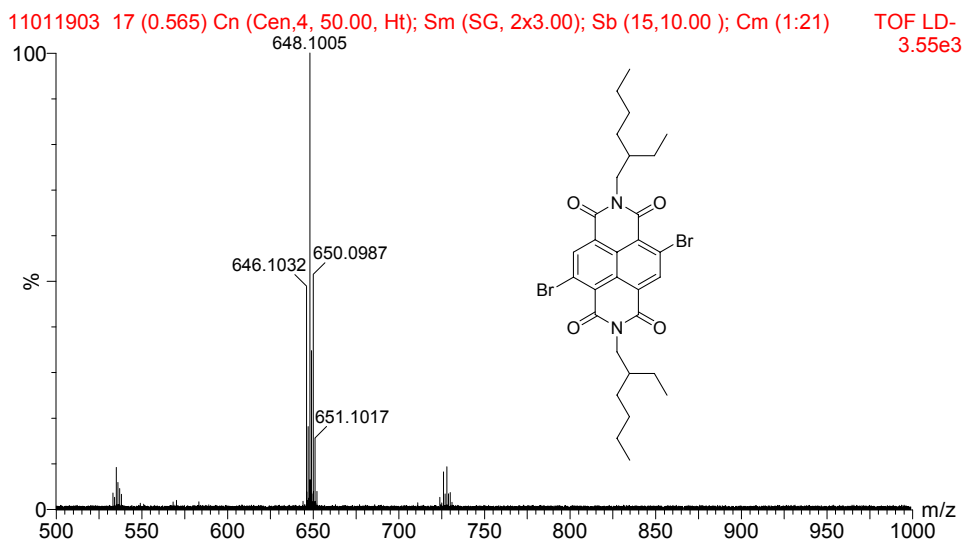

Fig. S4 TOF HRMS ESI of 7.

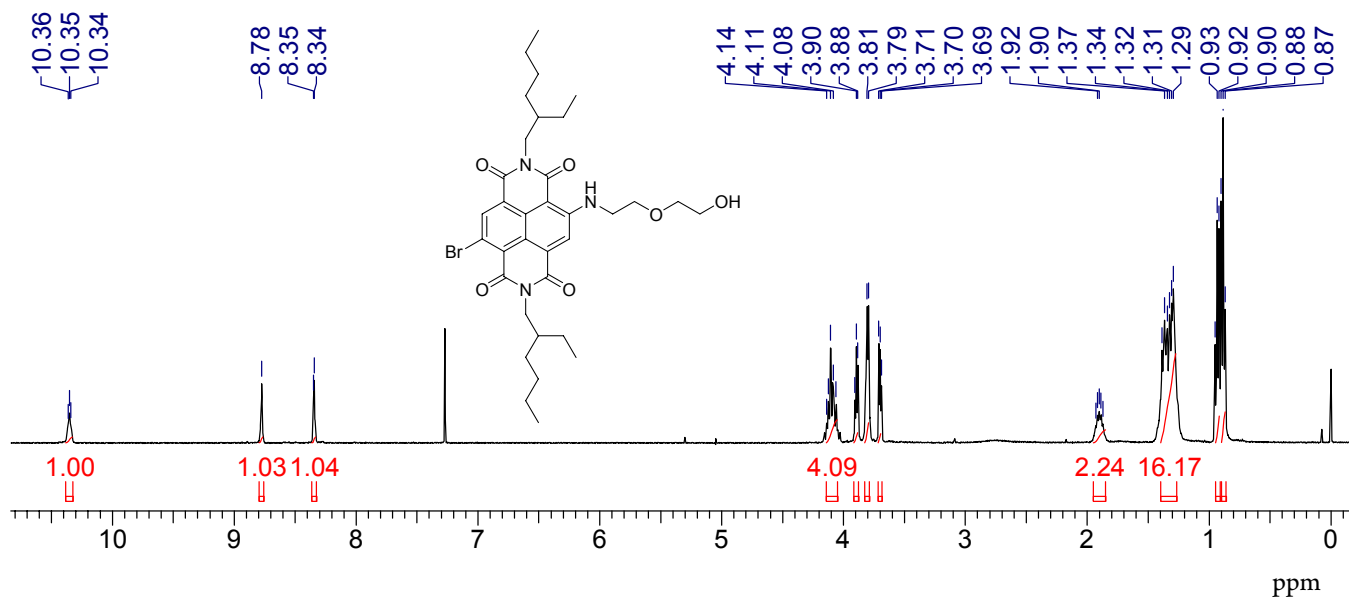

Fig. S5  $^1\text{H}$  NMR of 8 (400 MHz,  $\text{CDCl}_3$ ).

11011706 13 (0.350) AM (Cen,6, 80.00, Ar,5000.0,429.22,0.70,LS 10); Sm (SG, 2x3.00); Sb (1.40, 3.62e4

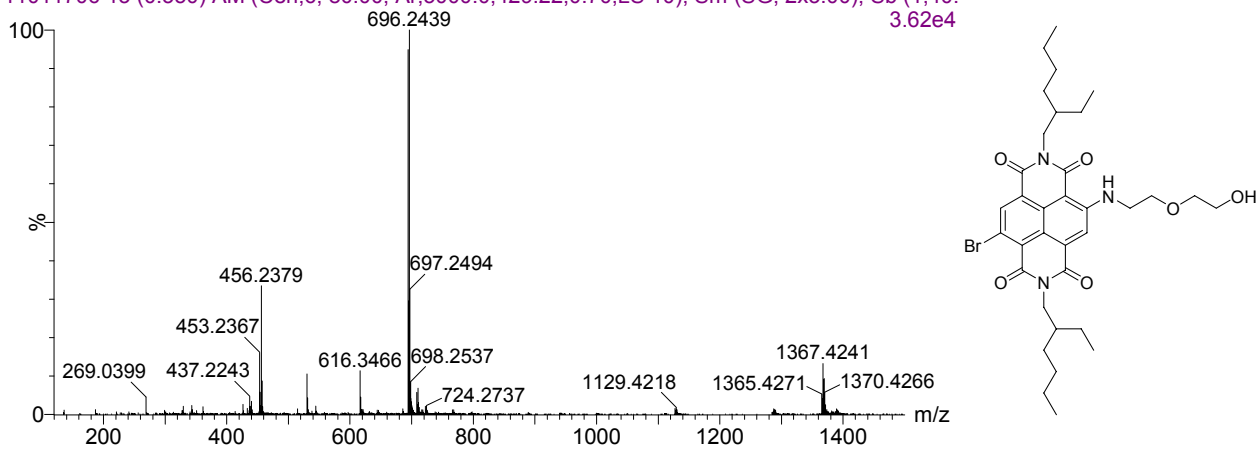

Fig. S6 TOF HRMS ESI of 8.

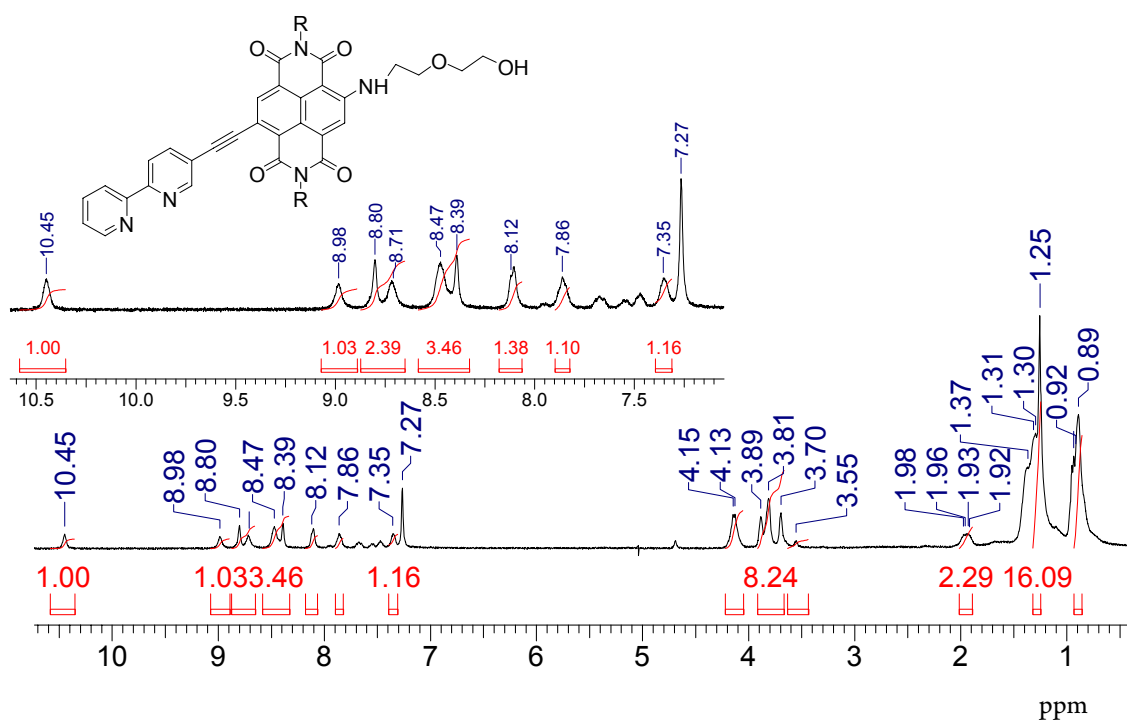

Fig. S7 <sup>1</sup>H NMR of 9 (400 MHz, CDCl<sub>3</sub>).

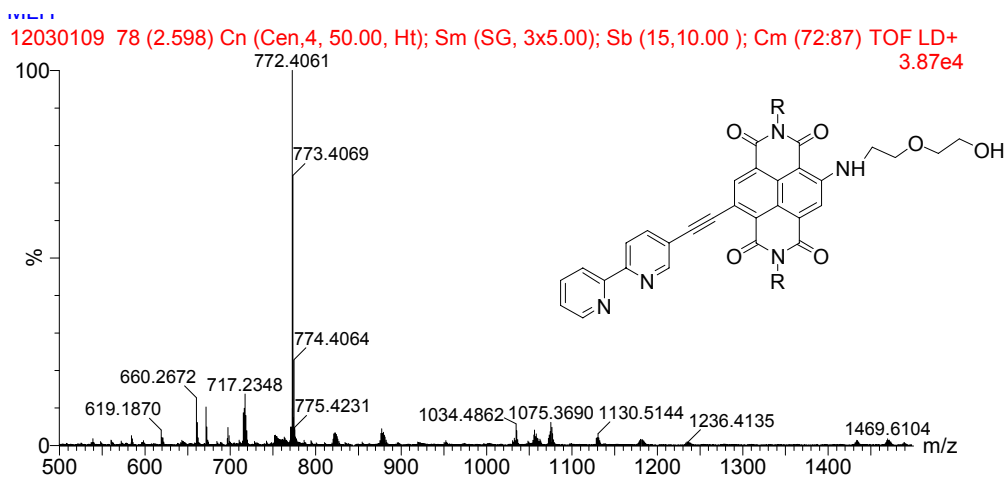

Fig. S8 TOF HRMS ESI of 9.

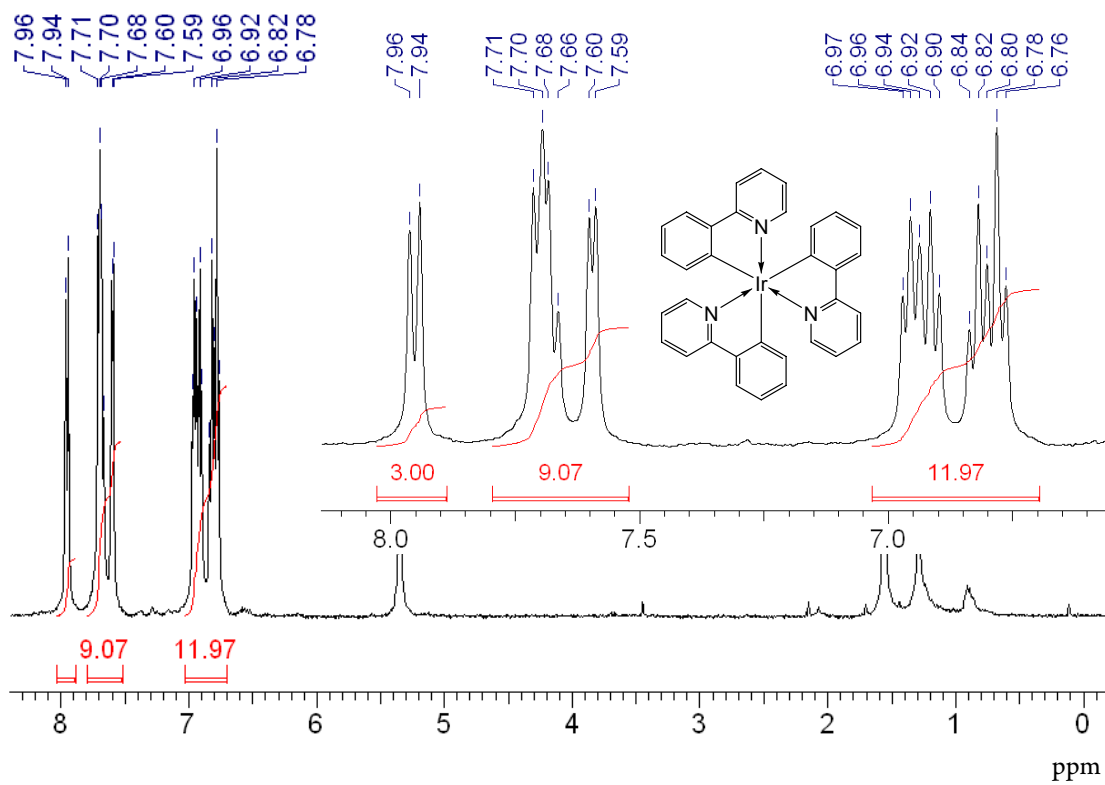

Fig. S9  $^1\text{H}$  NMR of Ir-2 (400 MHz,  $\text{CDCl}_3$ ).

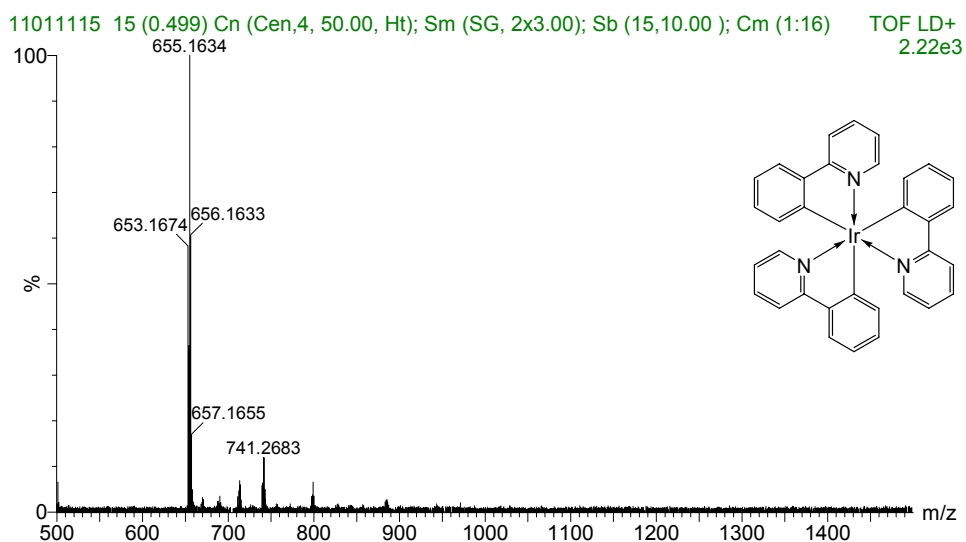

Fig. S10 TOF HRMS ESI of Ir-2.

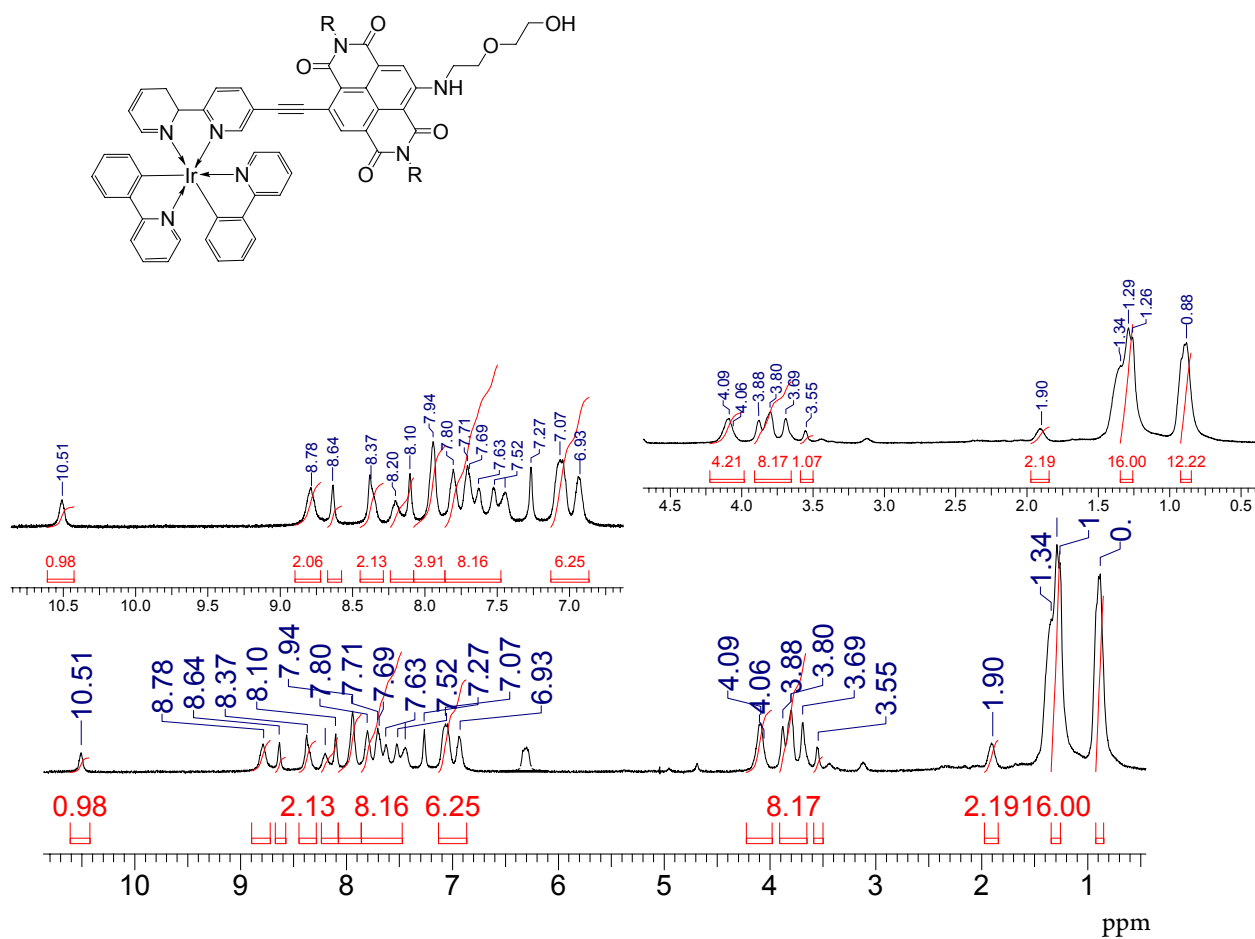

Fig. S11  $^1\text{H}$  NMR of Ir-1 (400 MHz,  $\text{CDCl}_3$ ).

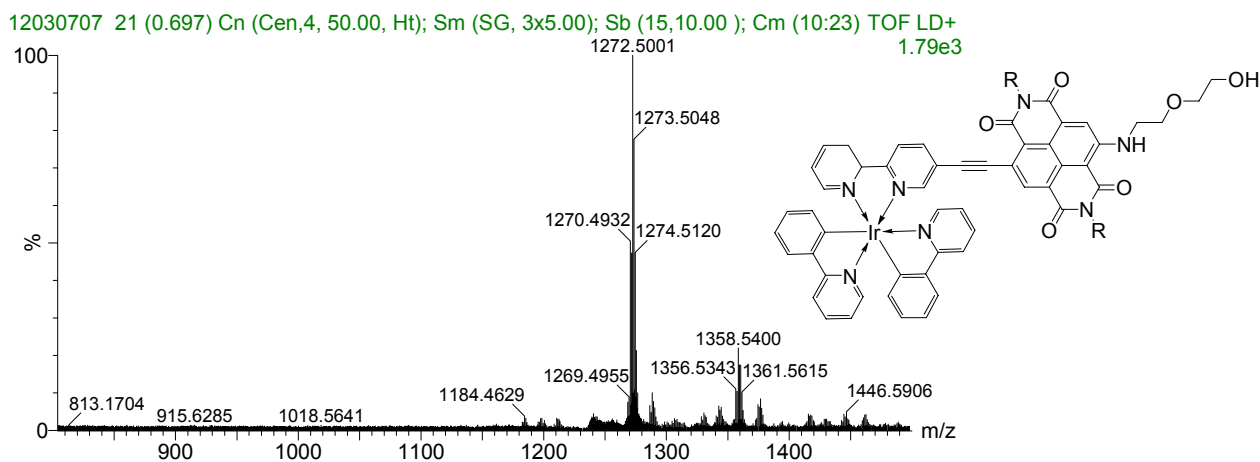

Fig. S12 TOF HRMS ESI of Ir-1.

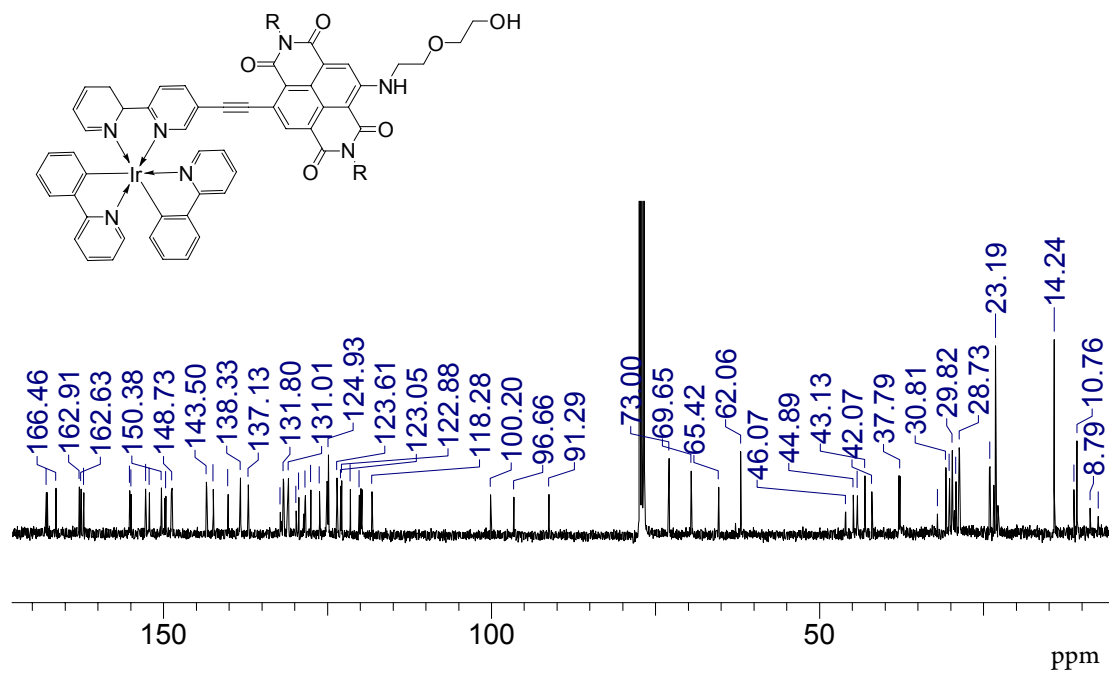

Fig. S13  $^{13}\text{C}$  NMR of Ir-1 (100 MHz,  $\text{CDCl}_3$ )

## 2. Calculation details

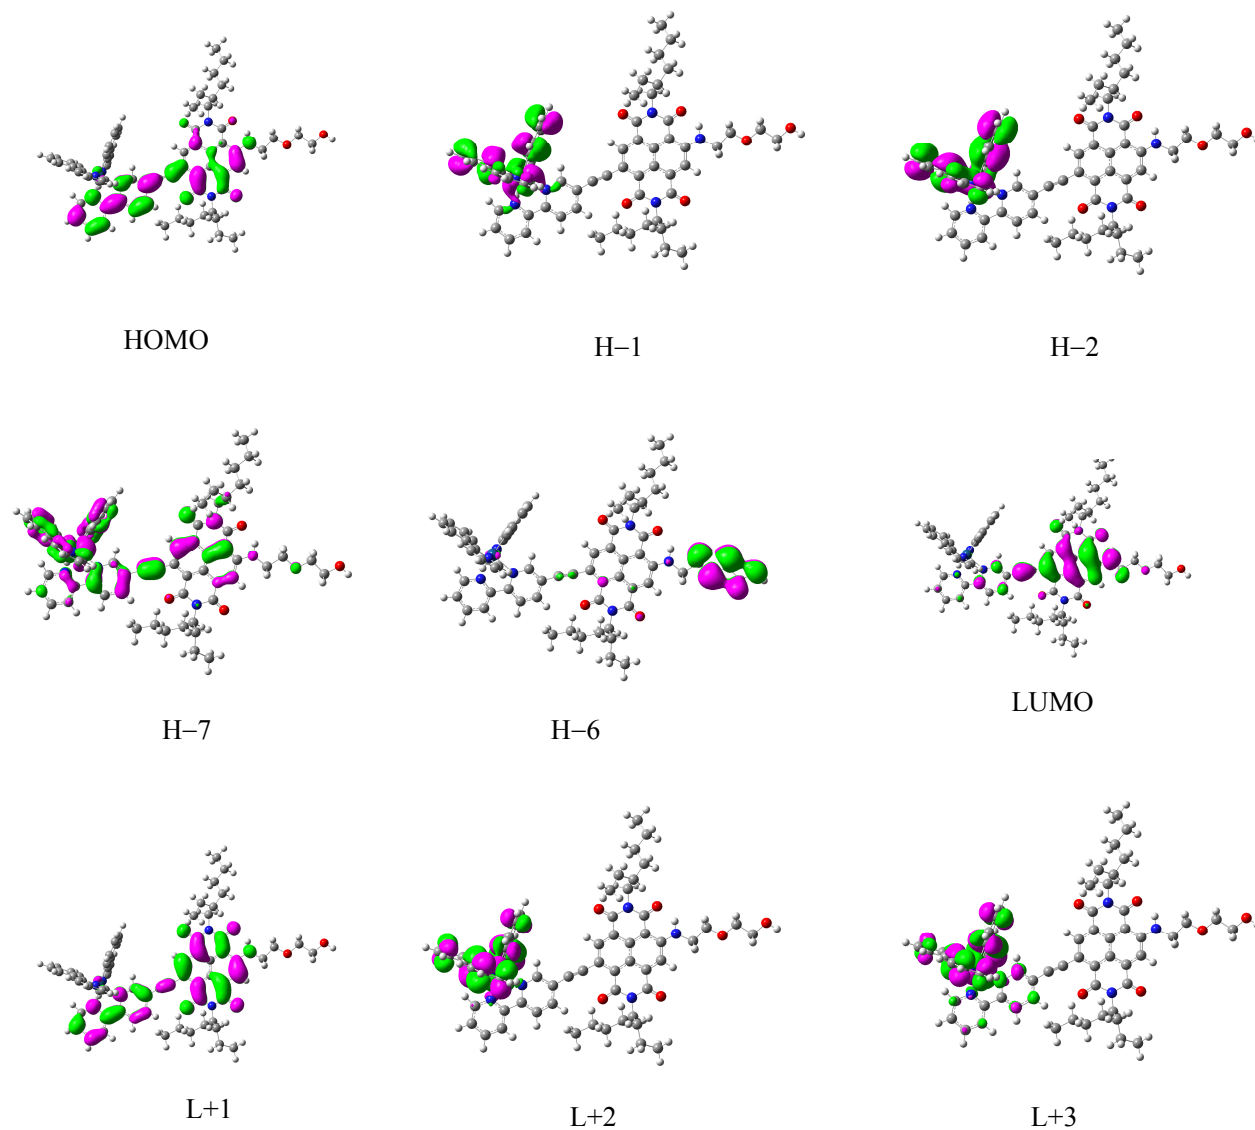

**Fig. S14** Frontier molecular orbitals of **Ir-1**. Calculation was performed at B3LYP/6-31G(d)/LanL2DZ level with Gaussian 09W.



**Table S1.** Selected Electronic Excitation Energies (eV) and corresponding Oscillator Strengths ( $f$ ), Main Configurations and CI Coefficients of the Low-lying Electronically Excited States of **Ir-1**.<sup>[a]</sup>

| electronic  |                          | TDDFT//B3LYP/6-31G(d)      |                    |                            |                   |
|-------------|--------------------------|----------------------------|--------------------|----------------------------|-------------------|
| transitions |                          | Energy (eV) <sup>[b]</sup> | $f$ <sup>[c]</sup> | composition <sup>[d]</sup> | CI <sup>[e]</sup> |
| singlet     | $S_0 \rightarrow S_1$    | 2.04 eV (607 nm)           | 0.0008             | H→L                        | 0.6517            |
|             |                          |                            |                    | H→L+1                      | 0.2679            |
|             | $S_0 \rightarrow S_2$    | 2.27 eV (545 nm)           | 0.07364            | H-1→L                      | 0.70256           |
|             | $S_0 \rightarrow S_4$    | 2.71 eV (457 nm)           | 0.2736             | H-2→L                      | 0.1011            |
|             |                          |                            |                    | H-1→L+1                    | 0.6868            |
|             | $S_0 \rightarrow S_{14}$ | 3.20 eV (387 nm)           | 0.2000             | H-8→L                      | 0.1590            |
|             |                          |                            |                    | H-7→L                      | 0.3925            |
|             |                          |                            |                    | H-6→L                      | 0.4238            |
|             |                          |                            |                    | H-6→L+1                    | 0.1199            |
|             |                          |                            |                    | H-5→L+1                    | 0.1115            |
|             |                          |                            |                    | H-4→L                      | 0.1096            |
|             |                          |                            |                    | H-2→L+1                    | 0.1644            |
|             |                          |                            |                    | H→L+2                      | 0.1174            |
|             | H→L+3                    | 0.1895                     |                    |                            |                   |
| triplet     | $S_0 \rightarrow T_1$    | 1.56 eV (796 nm)           | 0.0000             | H-1→L                      | 0.6707            |
|             |                          |                            |                    | H→L+1                      | 0.1802            |
|             | $S_0 \rightarrow T_2$    | 2.03 eV (611 nm)           | 0.0000             | H→L                        | 0.6408            |

[a] Calculated by TDDFT//B3LYP/6-31G(d)/LanL2DZ, based on the optimized ground state geometries. [b]

Only the low-lying excited states and some allowed transitions were presented.

[c] Oscillator strength.

[d] Only the main configurations with interaction (CI) coefficients are presented.

[e] CI coefficients are in absolute value.

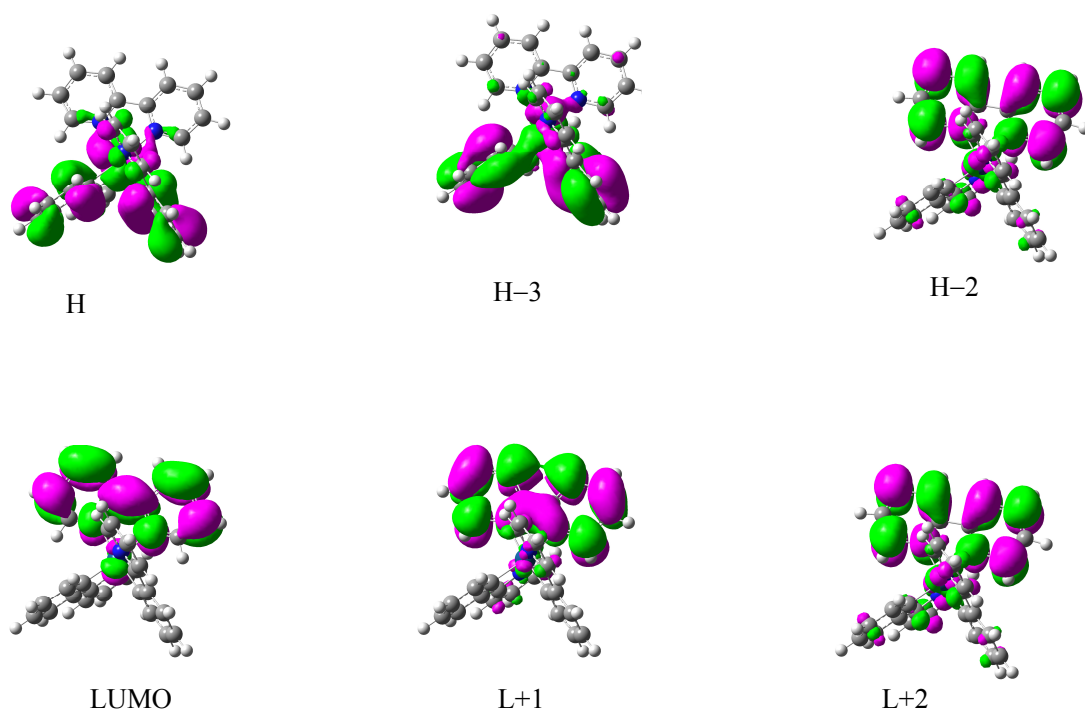

**Fig. S15** Frontier molecular orbitals of **Ir-2**. Calculation was performed at B3LYP/6-31G(d)/LanL2DZ level with Gaussian 09W.

**Table S2.** Selected Electronic Excitation Energies (eV) and corresponding Oscillator Strengths ( $f$ ), Main Configurations and CI Coefficients of the Low-lying Electronically Excited States of **Ir-2**.<sup>[a]</sup>

| electronic  |                          | TDDFT//B3LYP/6-31G(d)      |                    |                            |                   |
|-------------|--------------------------|----------------------------|--------------------|----------------------------|-------------------|
| transitions |                          | Energy (eV) <sup>[b]</sup> | $f$ <sup>[c]</sup> | composition <sup>[d]</sup> | CI <sup>[e]</sup> |
| singlet     | $S_0 \rightarrow S_1$    | 2.45eV (505 nm)            | 0.0002             | H→L                        | 0.7026            |
|             | $S_0 \rightarrow S_2$    | 3.11eV (399 nm)            | 0.0736             | H→L+1                      | 0.6956            |
|             | $S_0 \rightarrow S_6$    | 3.40eV (365 nm)            | 0.0708             | H-5→L                      | 0.1777            |
|             |                          |                            |                    | H-3→L                      | 0.6509            |
|             |                          |                            |                    | H-1→L                      | 0.144273          |
|             | $S_0 \rightarrow S_{20}$ | 4.11eV (302 nm)            | 0.1034             | H-6→L                      | 0.1592            |
|             |                          |                            |                    | H-4→L+1                    | 0.1396            |
|             |                          |                            |                    | H-4→L+3                    | 0.1484            |
|             |                          |                            |                    | H-3→L+2                    | 0.4989            |
|             |                          |                            |                    | H-2→L+1                    | 0.1459            |
| H-2→L+2     |                          |                            |                    | 0.3250                     |                   |
| triplet     | $S_0 \rightarrow T_1$    | 2.42 eV(512 nm)            | 0.0000             | H-1→L+2                    | 0.2015            |
|             |                          |                            |                    | H→L                        | 0.6974            |

[a] Calculated by TDDFT//B3LYP/6-31G(d)/ LanL2DZ, based on the optimized ground stated geometries.

[b] Only the low-lying excited states and some allowed transitions were presented.

[c] Oscillator strength.

[d] Only the main configurations with interaction (CI) coefficients are presented .

[e] CI coefficients are in absolute value.

### 3. The emission spectra at 77 K

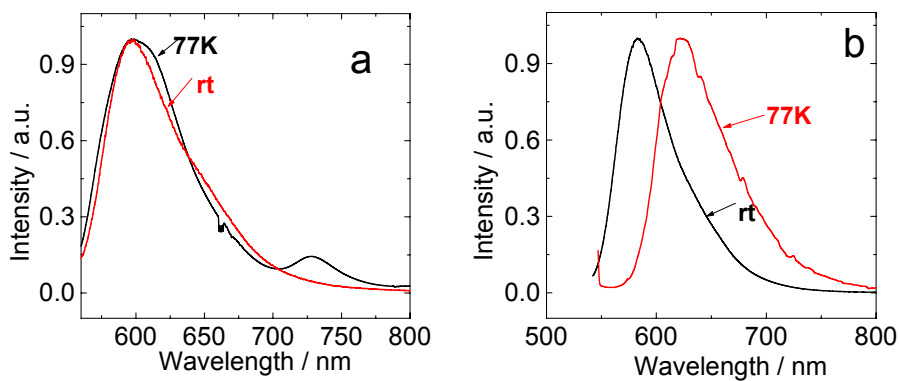

**Fig. S16** Photoluminescence spectra of (a) **Ir-1** ( $\lambda_{\text{ex}} = 550$  nm) and (b) ligand **9** ( $\lambda_{\text{ex}} = 550$  nm) at RT and 77 K (in EtOH–MeOH, 4 : 1, v/v). Please note that due to technical reasons, the solutions were not fully de-aerated. However, this situation does not have any negative impact on the experiments because

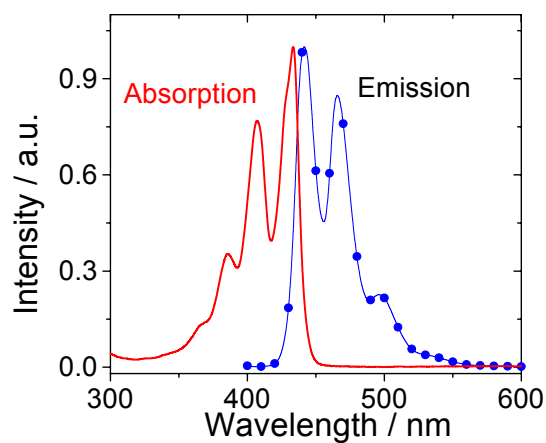

**Fig. S17** Absorption and fluorescence spectra of **perylene**,  $\lambda_{\text{ex}} = 390$  nm,  $c = 1.0 \times 10^{-5}$  M, 20 °C.

#### 4. The excitation spectra and UV-vis absorption spectra

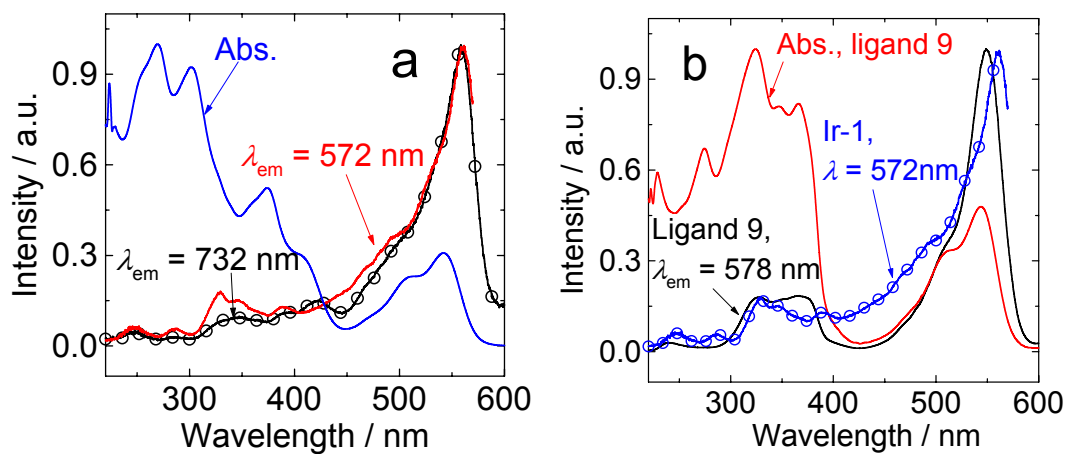

**Fig. S18** Normalized UV-Vis absorption and excitation spectra of (a) complex **Ir-1** (with 572 and 732 nm as the emission wavelength, respectively) and (b) ligand **9** and complex **Ir-1** (with 572 nm as the emission wavelength).  $c = 1.0 \times 10^{-5}$  M in deaerated  $\text{CH}_2\text{Cl}_2$ , 20°C.

## 5. Z-matrix

### Compound Ir-1. Ground state geometry.

Symbolic Z-matrix:

Charge = 1 Multiplicity = 1

|     |              |             |             |
|-----|--------------|-------------|-------------|
| 1 1 |              |             |             |
| C   | 0.68099224   | -1.04947422 | -0.38614853 |
| C   | -0.52614485  | -1.20471232 | -0.40403077 |
| C   | -2.91973708  | -0.63572165 | -0.30617058 |
| C   | -2.26639595  | -2.92537639 | -0.64648467 |
| H   | -2.69304227  | 0.41340966  | -0.15269765 |
| C   | -3.61241219  | -3.25334716 | -0.69114974 |
| H   | -1.49718079  | -3.68189888 | -0.76217382 |
| C   | -4.58682984  | -2.25601407 | -0.53910485 |
| C   | -6.04047596  | -2.52549470 | -0.58103371 |
| C   | -6.57697929  | -3.81390536 | -0.71012435 |
| C   | -8.19184844  | -1.61579927 | -0.52303820 |
| C   | -7.95699879  | -3.98725715 | -0.74759515 |
| C   | -8.78383829  | -2.86799445 | -0.65364169 |
| H   | -8.78244735  | -0.70952080 | -0.44253094 |
| H   | -8.37829071  | -4.98286563 | -0.84656296 |
| H   | -9.86463028  | -2.95565305 | -0.67745425 |
| N   | -6.85908797  | -1.44362500 | -0.48923800 |
| C   | -1.88680441  | -1.58105184 | -0.45115213 |
| C   | -5.42803812  | -0.42102234 | 2.69729118  |
| C   | -6.82166773  | 0.12003023  | 4.56371433  |
| H   | -4.56565452  | -0.90010714 | 2.25017955  |
| C   | -7.62596132  | 0.85430004  | 3.70381967  |
| H   | -7.06466497  | 0.05853743  | 5.62023217  |
| C   | -7.31234617  | 0.94015863  | 2.33845364  |
| H   | -8.49900340  | 1.37195955  | 4.08313474  |
| C   | -8.06465048  | 1.68531884  | 1.33087510  |
| C   | -9.24394405  | 2.39578220  | 1.61538837  |
| C   | -8.21133619  | 2.36062176  | -0.98048912 |
| C   | -9.90399519  | 3.08469831  | 0.60466867  |
| H   | -9.65039996  | 2.41605344  | 2.62285921  |
| C   | -9.38280963  | 3.06562838  | -0.69360194 |
| H   | -7.82979595  | 2.37486304  | -1.99726742 |
| H   | -10.81334713 | 3.63585222  | 0.82430998  |
| H   | -9.89118328  | 3.60899217  | -1.48629247 |
| C   | -5.69602877  | -0.53350305 | 4.05289508  |
| H   | -5.03629376  | -1.11469929 | 4.68749907  |
| C   | -4.29346596  | 2.80058472  | 1.17873527  |
| C   | -3.03618819  | 4.45679169  | -0.07780153 |
| C   | -4.72734700  | 2.17780765  | -0.00101479 |
| H   | -4.60861659  | 2.41517853  | 2.14397340  |
| C   | -3.45543811  | 3.86661880  | -1.26414499 |
| H   | -2.38726773  | 5.32688938  | -0.10115687 |
| C   | -4.29480748  | 2.73929462  | -1.23283309 |
| H   | -3.12544182  | 4.28678262  | -2.21018583 |
| C   | -4.77839455  | 2.06403621  | -2.43507817 |
| C   | -4.51360903  | 2.44886634  | -3.75880055 |

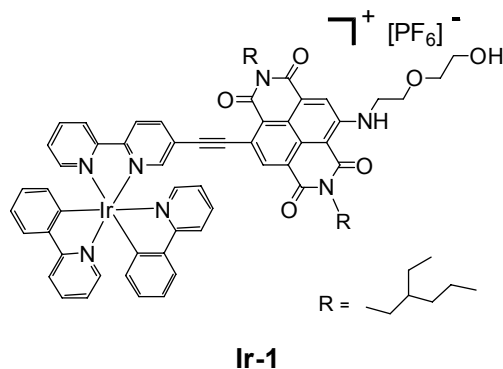

|    |             |             |             |
|----|-------------|-------------|-------------|
| C  | -6.07590062 | 0.26977312  | -3.22865145 |
| C  | -5.04400322 | 1.72754224  | -4.81859166 |
| H  | -3.89528478 | 3.31861321  | -3.94661469 |
| C  | -5.84497682 | 0.61264903  | -4.55183604 |
| H  | -6.69299310 | -0.58025038 | -2.96396865 |
| H  | -4.84006752 | 2.02949108  | -5.84147684 |
| H  | -6.28409043 | 0.02181209  | -5.34799911 |
| N  | -5.56134020 | 0.96710548  | -2.19589752 |
| C  | -3.45956096 | 3.92086746  | 1.14322587  |
| H  | -3.13903645 | 4.38234099  | 2.07393282  |
| Ir | -5.86398577 | 0.51521520  | -0.18451720 |
| N  | -4.21653952 | -0.96096801 | -0.34456609 |
| C  | -7.52545818 | 1.64992479  | 0.01618755  |
| N  | -6.20723717 | 0.29064008  | 1.85837687  |
| H  | -5.92554855 | -4.67679837 | -0.77530675 |
| H  | -3.90064760 | -4.28552181 | -0.85025341 |
| C  | 6.40845883  | 2.00443872  | -0.14658865 |
| C  | 6.11971205  | 0.57073027  | -0.25569088 |
| C  | 4.77433443  | 0.13672069  | -0.28118919 |
| C  | 3.71336601  | 1.07355278  | -0.20809467 |
| C  | 3.98708716  | 2.52716291  | -0.10031444 |
| C  | 7.17361299  | -0.38681531 | -0.34603200 |
| C  | 4.44081644  | -1.24571638 | -0.38859133 |
| C  | 5.51026771  | -2.18332862 | -0.46438551 |
| C  | 6.81708717  | -1.77332469 | -0.44459686 |
| C  | 5.22786507  | -3.64065988 | -0.57211271 |
| C  | 2.79626176  | -3.13225662 | -0.55062388 |
| C  | 3.10120098  | -1.67662747 | -0.42701120 |
| C  | 2.06037626  | -0.72264489 | -0.35456808 |
| C  | 2.39920036  | 0.64847461  | -0.24425467 |
| H  | 1.61416647  | 1.39403634  | -0.18814251 |
| H  | 7.58723031  | -2.53256241 | -0.50863803 |
| N  | 5.33419308  | 2.89711428  | -0.02281282 |
| N  | 3.88107328  | -4.02231385 | -0.57730550 |
| O  | 6.11874466  | -4.47320693 | -0.65314851 |
| O  | 1.64772404  | -3.54988629 | -0.62724684 |
| O  | 7.56069101  | 2.45993945  | -0.15658398 |
| O  | 3.08595911  | 3.35684880  | -0.06981451 |
| C  | 3.60362703  | -5.47277572 | -0.70041737 |
| H  | 2.58418018  | -5.56201955 | -1.07387026 |
| H  | 4.29353046  | -5.85075014 | -1.45591132 |
| C  | 3.79239400  | -6.26114515 | 0.61371626  |
| H  | 4.81187701  | -6.05158767 | 0.96224553  |
| C  | 2.83279285  | -5.82399283 | 1.74374950  |
| H  | 3.17598731  | -6.30514539 | 2.67087209  |
| H  | 2.94616502  | -4.74374326 | 1.91391992  |
| C  | 1.34207125  | -6.14103853 | 1.54834122  |
| H  | 1.20233508  | -7.22351642 | 1.42391208  |
| H  | 0.97998345  | -5.66507894 | 0.62856256  |
| C  | 0.48134032  | -5.66208856 | 2.72610668  |
| H  | 0.83736453  | -6.13190503 | 3.65373789  |
| H  | 0.62146698  | -4.57989455 | 2.85901954  |
| C  | -1.01012373 | -5.96401291 | 2.54492778  |
| H  | -1.18667216 | -7.04065546 | 2.43097483  |
| H  | -1.59711118 | -5.62021852 | 3.40478818  |
| H  | -1.40708700 | -5.46789437 | 1.64918109  |

|   |             |             |             |
|---|-------------|-------------|-------------|
| C | 3.71051621  | -7.77949670 | 0.33482130  |
| H | 3.63637805  | -8.29568874 | 1.30154050  |
| H | 2.77914289  | -8.01077611 | -0.20097163 |
| C | 4.90343007  | -8.35767069 | -0.43822601 |
| H | 4.80946245  | -9.44504728 | -0.53531654 |
| H | 4.98499466  | -7.94759875 | -1.45097062 |
| H | 5.84728768  | -8.14778195 | 0.07823475  |
| C | 5.67591152  | 4.33832255  | 0.05045739  |
| H | 4.75028526  | 4.87238291  | -0.16210565 |
| H | 6.38239675  | 4.52167437  | -0.76227914 |
| C | 6.30359643  | 4.79294397  | 1.39676698  |
| H | 6.80038512  | 3.91983485  | 1.83795383  |
| C | 7.42179850  | 5.82888242  | 1.12939778  |
| H | 7.92557196  | 6.04449257  | 2.08217345  |
| H | 8.17524688  | 5.35539071  | 0.48501721  |
| C | 6.97850492  | 7.15690046  | 0.49509868  |
| H | 6.25371656  | 7.66132825  | 1.14857961  |
| H | 6.45372693  | 6.96739066  | -0.45311376 |
| C | 8.15326015  | 8.10885774  | 0.22796380  |
| H | 8.87884805  | 7.61205746  | -0.43164981 |
| H | 8.68304670  | 8.30124388  | 1.17163193  |
| C | 7.72142072  | 9.43969766  | -0.39665005 |
| H | 7.02566778  | 9.97845249  | 0.25847545  |
| H | 8.58168840  | 10.09384420 | -0.57766841 |
| H | 7.21542852  | 9.28138508  | -1.35722230 |
| C | 5.27667979  | 5.31518610  | 2.42425024  |
| H | 5.83862267  | 5.78775265  | 3.24165906  |
| H | 4.67289512  | 6.11283714  | 1.97136155  |
| C | 4.34253232  | 4.25597868  | 3.02260519  |
| H | 3.74468469  | 4.68622995  | 3.83454919  |
| H | 3.64500676  | 3.86180259  | 2.27792619  |
| H | 4.91252393  | 3.41700410  | 3.44255604  |
| N | 8.46925014  | -0.02267662 | -0.33865186 |
| H | 8.61946033  | 0.98526698  | -0.27438357 |
| C | 9.60800212  | -0.92632907 | -0.42204746 |
| H | 9.60659377  | -1.63631151 | 0.41465232  |
| H | 9.57871549  | -1.50849262 | -1.35186989 |
| C | 10.90508271 | -0.12112115 | -0.38417254 |
| H | 10.93124147 | 0.59461286  | -1.22378507 |
| H | 10.96108093 | 0.46267937  | 0.55070371  |
| O | 11.96184983 | -1.04418961 | -0.47119215 |
| C | 13.24368080 | -0.43487930 | -0.44582996 |
| H | 13.35734384 | 0.27436337  | -1.28029224 |
| H | 13.39544270 | 0.12125791  | 0.49216729  |
| C | 14.28606680 | -1.53666357 | -0.56390559 |
| H | 14.12196015 | -2.08903194 | -1.50187401 |
| H | 14.15922148 | -2.24441209 | 0.26974163  |
| O | 15.55148168 | -0.89569025 | -0.53414785 |
| H | 16.23757539 | -1.57498946 | -0.60851296 |

### Compound Ir-1. Triplet state geometry.

Symbolic Z-matrix:

Charge = 1 Multiplicity = 3

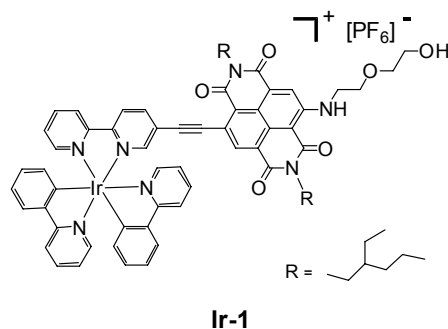



13

|   |              |             |             |
|---|--------------|-------------|-------------|
| C | 0.72829100   | -0.75564300 | -0.27865100 |
| C | -0.49124400  | -0.87251900 | -0.28343900 |
| C | -2.91819500  | -0.42803100 | -0.22125300 |
| C | -2.11609300  | -2.69280400 | -0.45039100 |
| H | -2.75966000  | 0.64033900  | -0.12366500 |
| C | -3.43571900  | -3.10600600 | -0.47570500 |
| H | -1.29500900  | -3.39752500 | -0.53372000 |
| C | -4.47539400  | -2.16587600 | -0.36869700 |
| C | -5.90329600  | -2.53247800 | -0.38616100 |
| C | -6.35275600  | -3.86136400 | -0.42360400 |
| C | -8.11365000  | -1.77070900 | -0.37514000 |
| C | -7.71681900  | -4.13033100 | -0.44022100 |
| C | -8.61916900  | -3.06601100 | -0.41717500 |
| H | -8.76567300  | -0.90422400 | -0.35179800 |
| H | -8.06889200  | -5.15691500 | -0.46765700 |
| H | -9.69143700  | -3.22838600 | -0.42771100 |
| N | -6.79614400  | -1.50484900 | -0.36212800 |
| C | -1.82467200  | -1.31370500 | -0.31652800 |
| C | -5.46117100  | -0.15379600 | 2.74710500  |
| C | -6.89655200  | 0.44021700  | 4.56505800  |
| H | -4.56781400  | -0.60995700 | 2.33856000  |
| C | -7.74176200  | 1.05224300  | 3.65038900  |
| H | -7.14072200  | 0.44563200  | 5.62310500  |
| C | -7.42744900  | 1.05090600  | 2.28250400  |
| H | -8.64822300  | 1.54048800  | 3.98805000  |
| C | -8.22258600  | 1.66130100  | 1.21884900  |
| C | -9.44992500  | 2.30832500  | 1.44556800  |
| C | -8.40723800  | 2.12966200  | -1.14052000 |
| C | -10.15237200 | 2.86318300  | 0.38230600  |
| H | -9.86172300  | 2.38208600  | 2.44838600  |
| C | -9.62657900  | 2.77164900  | -0.91101300 |
| H | -8.02559000  | 2.08318700  | -2.15638800 |
| H | -11.09914600 | 3.36529200  | 0.55689600  |
| H | -10.16964500 | 3.20860500  | -1.74542300 |
| C | -5.72901800  | -0.17795500 | 4.10720300  |
| H | -5.03747100  | -0.66542700 | 4.78536600  |
| C | -4.54017500  | 3.01655200  | 0.99705200  |
| C | -3.39725000  | 4.66250000  | -0.37628200 |
| C | -4.91965200  | 2.27768600  | -0.13379000 |
| H | -4.83327500  | 2.68181500  | 1.98773000  |
| C | -3.76264100  | 3.95623000  | -1.51610000 |
| H | -2.81422600  | 5.57430800  | -0.46323600 |
| C | -4.51814700  | 2.77613100  | -1.40279100 |
| H | -3.45674900  | 4.32795100  | -2.49015600 |
| C | -4.94200600  | 1.98043100  | -2.55292400 |
| C | -4.69269000  | 2.28359000  | -3.90061200 |
| C | -6.10110100  | 0.04401900  | -3.21484300 |
| C | -5.15989400  | 1.44887700  | -4.90552400 |
| H | -4.13587200  | 3.17887300  | -4.15057400 |
| C | -5.88211300  | 0.30266800  | -4.55911400 |
| H | -6.65953000  | -0.82495500 | -2.88944100 |
| H | -4.96796800  | 1.68737500  | -5.94733500 |
| H | -6.27047800  | -0.37592600 | -5.31042800 |
| N | -5.64745400  | 0.85133400  | -2.23520000 |
| C | -3.78977100  | 4.18906000  | 0.88032200  |

|    |             |             |             |
|----|-------------|-------------|-------------|
| H  | -3.51131000 | 4.74056500  | 1.77492500  |
| Ir | -5.93674400 | 0.53078100  | -0.19687100 |
| N  | -4.18882600 | -0.83713800 | -0.24420400 |
| C  | -7.67589900 | 1.55619800  | -0.08905000 |
| N  | -6.27964400 | 0.43952700  | 1.85527400  |
| H  | -5.64435000 | -4.68058100 | -0.43148400 |
| H  | -3.65776000 | -4.16070700 | -0.58552400 |
| C  | 6.60564500  | 1.94474000  | -0.13789800 |
| C  | 6.22242400  | 0.51936800  | -0.24234200 |
| C  | 4.87181700  | 0.16690800  | -0.24213000 |
| C  | 3.86456700  | 1.17957600  | -0.14465700 |
| C  | 4.22634700  | 2.60127400  | -0.03434400 |
| C  | 7.23389100  | -0.53577500 | -0.35798200 |
| C  | 4.46010100  | -1.21066500 | -0.34847900 |
| C  | 5.47015200  | -2.20973900 | -0.44990600 |
| C  | 6.81743200  | -1.87418900 | -0.45489200 |
| C  | 5.10060300  | -3.62940500 | -0.56400400 |
| C  | 2.70097700  | -2.96536300 | -0.47542200 |
| C  | 3.10132800  | -1.56022700 | -0.36025400 |
| C  | 2.10412000  | -0.50771800 | -0.26690700 |
| C  | 2.52250100  | 0.83431100  | -0.16056200 |
| H  | 1.78491000  | 1.62532300  | -0.08955900 |
| H  | 7.53609400  | -2.67984700 | -0.54029100 |
| N  | 5.60197800  | 2.89213100  | 0.01373900  |
| N  | 3.73164600  | -3.92126200 | -0.54546200 |
| O  | 5.93963800  | -4.52131700 | -0.67229400 |
| O  | 1.51887500  | -3.31981400 | -0.51377900 |
| O  | 7.78836600  | 2.31918400  | -0.17942500 |
| O  | 3.38574500  | 3.49257200  | 0.02374600  |
| C  | 3.36310200  | -5.34636800 | -0.68800100 |
| H  | 2.33092300  | -5.36634400 | -1.03621300 |
| H  | 4.01132000  | -5.75086300 | -1.46671000 |
| C  | 3.53647600  | -6.17374200 | 0.60442300  |
| H  | 4.56906900  | -6.01624600 | 0.94085200  |
| C  | 2.61365700  | -5.72174400 | 1.75868700  |
| H  | 2.94990400  | -6.23576000 | 2.67089600  |
| H  | 2.77237800  | -4.65046800 | 1.94641800  |
| C  | 1.10859400  | -5.97380700 | 1.57997100  |
| H  | 0.92279400  | -7.04573400 | 1.42646400  |
| H  | 0.75432900  | -5.45525800 | 0.68059600  |
| C  | 0.28692000  | -5.49597900 | 2.78565100  |
| H  | 0.64008400  | -6.00506700 | 3.69351300  |
| H  | 0.47134000  | -4.42414100 | 2.94566500  |
| C  | -1.21819400 | -5.73545700 | 2.62456700  |
| H  | -1.43811000 | -6.80086700 | 2.48300400  |
| H  | -1.77651700 | -5.39487800 | 3.50467300  |
| H  | -1.61160700 | -5.19811300 | 1.75124700  |
| C  | 3.38455200  | -7.68032500 | 0.29309900  |
| H  | 3.28699100  | -8.21577300 | 1.24740800  |
| H  | 2.44353900  | -7.85629000 | -0.24710300 |
| C  | 4.54939800  | -8.29421100 | -0.49506600 |
| H  | 4.40262100  | -9.37251800 | -0.62462000 |
| H  | 4.65425500  | -7.85757900 | -1.49435500 |
| H  | 5.50089700  | -8.14543800 | 0.02842900  |
| C  | 6.03101700  | 4.31133000  | 0.08569700  |
| H  | 5.13321900  | 4.89964400  | -0.09997600 |

|   |             |             |             |
|---|-------------|-------------|-------------|
| H | 6.72557900  | 4.45713900  | -0.74494000 |
| C | 6.71892300  | 4.72021800  | 1.41632800  |
| H | 7.20835200  | 3.82605100  | 1.82247700  |
| C | 7.85436300  | 5.73061900  | 1.12295400  |
| H | 8.39673200  | 5.91856100  | 2.06006700  |
| H | 8.57278400  | 5.24754200  | 0.44605700  |
| C | 7.42554900  | 7.07886200  | 0.52231900  |
| H | 6.73864000  | 7.59344300  | 1.20778400  |
| H | 6.86299300  | 6.91760400  | -0.40927200 |
| C | 8.61676200  | 8.00170700  | 0.22654800  |
| H | 9.30439600  | 7.49445800  | -0.46505000 |
| H | 9.18442100  | 8.16550100  | 1.15340500  |
| C | 8.20056700  | 9.35272800  | -0.36429300 |
| H | 7.54318700  | 9.90049900  | 0.32211300  |
| H | 9.07197400  | 9.98558300  | -0.56610400 |
| H | 7.65765100  | 9.22242900  | -1.30871200 |
| C | 5.74709400  | 5.25025800  | 2.49239000  |
| H | 6.35489600  | 5.68656700  | 3.29687900  |
| H | 5.15277200  | 6.07634300  | 2.08028500  |
| C | 4.80310400  | 4.20816900  | 3.10511200  |
| H | 4.25505600  | 4.63863400  | 3.95110200  |
| H | 4.06071400  | 3.85660500  | 2.38302700  |
| H | 5.36018500  | 3.34051300  | 3.48194400  |
| N | 8.54074600  | -0.19627600 | -0.36690200 |
| H | 8.71424900  | 0.81385700  | -0.30365100 |
| C | 9.64841200  | -1.13087600 | -0.47642600 |
| H | 9.62082000  | -1.84834100 | 0.35349600  |
| H | 9.56795900  | -1.70550000 | -1.40807700 |
| C | 10.97781400 | -0.37927900 | -0.45535000 |
| H | 11.02160900 | 0.33975500  | -1.29153400 |
| H | 11.07489700 | 0.19545600  | 0.48184600  |
| O | 11.98558100 | -1.35085900 | -0.56495100 |
| C | 13.29791200 | -0.80582100 | -0.56298400 |
| H | 13.43197900 | -0.10716700 | -1.40296700 |
| H | 13.49070000 | -0.25430100 | 0.36989500  |
| C | 14.28189000 | -1.95893900 | -0.69167900 |
| H | 14.07494500 | -2.50751400 | -1.62335600 |
| H | 14.13451500 | -2.65492000 | 0.14838100  |
| O | 15.57632100 | -1.37928200 | -0.68687500 |
| H | 16.22839900 | -2.09061400 | -0.76797500 |

### Compound Ir-2. Ground state geometry.

Symbolic Z-matrix:

Charge = 1 Multiplicity = 1

|     |            |             |             |
|-----|------------|-------------|-------------|
| 1 1 |            |             |             |
| C   | 2.19227128 | 0.18539113  | 2.20150936  |
| C   | 4.09064153 | -1.32406160 | 2.32332241  |
| H   | 1.65528486 | 1.03475579  | 2.61235480  |
| C   | 3.61197005 | -1.99619652 | 1.20671336  |
| H   | 5.01072268 | -1.64597388 | 2.80358571  |
| C   | 2.42045096 | -1.58339933 | 0.58054221  |
| C   | 1.87360146 | -2.27660536 | -0.58872487 |
| C   | 2.43089878 | -3.41383403 | -1.20104384 |
| C   | 0.12381815 | -2.30767290 | -2.15043541 |

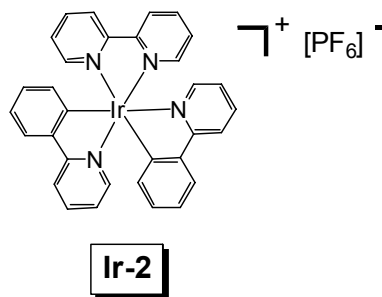

|    |             |             |             |
|----|-------------|-------------|-------------|
| C  | 1.81384322  | -3.98897656 | -2.30287804 |
| C  | 0.63101064  | -3.42847853 | -2.79441139 |
| H  | -0.79457136 | -1.83294942 | -2.47943764 |
| H  | 2.24582143  | -4.86858786 | -2.77230823 |
| H  | 0.11042062  | -3.84915103 | -3.64817320 |
| N  | 0.72239745  | -1.74148001 | -1.08913286 |
| C  | 3.37147792  | -0.22933880 | 2.81925405  |
| H  | 3.73572427  | 0.30284684  | 3.69577607  |
| C  | -0.94309421 | -1.99101256 | 2.20074430  |
| C  | -3.20150438 | -2.87468099 | 2.32103865  |
| H  | 0.06075571  | -1.95294549 | 2.61247812  |
| C  | -3.54141640 | -2.12412489 | 1.20350668  |
| H  | -3.94233707 | -3.50829922 | 2.80116263  |
| C  | -2.58583558 | -1.30113908 | 0.57745004  |
| H  | -4.55765346 | -2.18106051 | 0.82125170  |
| C  | -2.90903562 | -0.48136735 | -0.59318923 |
| C  | -4.17161619 | -0.39203957 | -1.20700772 |
| C  | -2.05394168 | 1.04376789  | -2.15696927 |
| C  | -4.35712042 | 0.42875236  | -2.31043468 |
| H  | -5.00287272 | -0.96365721 | -0.81099106 |
| C  | -3.27698471 | 1.16783979  | -2.80249219 |
| H  | -1.18115086 | 1.59786366  | -2.48651113 |
| H  | -5.33414043 | 0.49704035  | -2.78101363 |
| H  | -3.37761280 | 1.82738985  | -3.65791172 |
| C  | -1.89420742 | -2.80211828 | 2.81828069  |
| H  | -1.61767019 | -3.38393387 | 3.69531763  |
| C  | -1.25587985 | 1.81176531  | 2.19868718  |
| C  | -0.89128894 | 4.20961254  | 2.31797069  |
| C  | -0.43250522 | 1.68660277  | 1.06246062  |
| H  | -1.72385578 | 0.92367730  | 2.61209784  |
| C  | -0.07173154 | 4.12797501  | 1.20021005  |
| H  | -1.06910476 | 5.16821726  | 2.79783840  |
| C  | 0.16260235  | 2.88854916  | 0.57482962  |
| H  | 0.38794141  | 5.03593012  | 0.81761319  |
| C  | 1.03627496  | 2.75770968  | -0.59421164 |
| C  | 1.74400518  | 3.80629947  | -1.20924669 |
| C  | 1.93680852  | 1.25215467  | -2.15133792 |
| C  | 2.55117751  | 3.55514421  | -2.30977648 |
| H  | 1.66150515  | 4.81291786  | -0.81618059 |
| C  | 2.65576037  | 2.24894584  | -2.79755123 |
| H  | 1.98258960  | 0.21839297  | -2.47773227 |
| H  | 3.09809849  | 4.36705819  | -2.78131478 |
| H  | 3.28009004  | 2.00527474  | -3.65061570 |
| N  | 1.14704111  | 1.49169659  | -1.09112918 |
| C  | -1.48217163 | 3.04147527  | 2.81574342  |
| H  | -2.12366806 | 3.09320901  | 3.69323839  |
| Ir | -0.00087185 | -0.00062654 | 0.02591375  |
| N  | 1.67413837  | -0.46820644 | 1.06609763  |
| C  | -1.86701629 | 0.24436678  | -1.09328977 |
| N  | -1.24714221 | -1.21547317 | 1.06446130  |
| H  | 3.31913551  | -3.71656457 | -0.94127198 |
| H  | 4.05025228  | -2.75218956 | 0.77720794  |

### Compound Ir-2. Triplet state geometry.

Symbolic Z-matrix:

Charge = 1 Multiplicity = 3

1 3

|   |             |             |             |
|---|-------------|-------------|-------------|
| C | -1.68151700 | 1.66936200  | -2.04457600 |
| C | -4.08275800 | 1.75655000  | -2.14431600 |
| H | -0.69360500 | 1.96541800  | -2.37142100 |
| C | -4.12705700 | 0.82860100  | -1.10218000 |
| H | -5.00206900 | 2.14087900  | -2.57056700 |
| C | -2.93306200 | 0.33847300  | -0.55427900 |
| C | -2.88157700 | -0.64102800 | 0.55002400  |
| C | -4.01801400 | -1.24928100 | 1.10186000  |
| C | -1.49814000 | -1.82852500 | 2.04473500  |
| C | -3.87740100 | -2.16246900 | 2.14850900  |
| C | -2.59717600 | -2.45628400 | 2.62917700  |
| H | -0.48486400 | -2.01829200 | 2.37301400  |
| H | -4.75181600 | -2.63706200 | 2.57825600  |
| H | -2.44779700 | -3.15939900 | 3.43925200  |
| N | -1.63318500 | -0.94051600 | 1.02941200  |
| C | -2.84036400 | 2.18352100  | -2.62451500 |
| H | -2.76574600 | 2.90304000  | -3.43050300 |
| C | -0.44673300 | -2.04136400 | -2.22445600 |
| C | 0.71455700  | -4.12705600 | -2.48065600 |
| H | -1.17287800 | -1.30436800 | -2.53659500 |
| C | 1.45045300  | -3.82324200 | -1.33965900 |
| H | 0.89157700  | -5.05433200 | -3.01371100 |
| C | 1.22769400  | -2.61950100 | -0.64745300 |
| H | 2.20539600  | -4.51044900 | -0.98077200 |
| C | 1.93244400  | -2.17219700 | 0.55014500  |
| C | 2.93331800  | -2.92971100 | 1.18969100  |
| C | 2.19936800  | -0.42026700 | 2.19885200  |
| C | 3.56324900  | -2.43349600 | 2.32899000  |
| H | 3.22516200  | -3.90134000 | 0.80341400  |
| C | 3.19376500  | -1.17715000 | 2.83132800  |
| H | 1.94428700  | 0.55163300  | 2.60743700  |
| H | 4.33652200  | -3.01384400 | 2.82012000  |
| H | 3.68755100  | -0.78482900 | 3.71527700  |
| C | -0.25328500 | -3.21912700 | -2.93494600 |
| H | -0.84170100 | -3.41765800 | -3.82198700 |
| C | 2.15194800  | 0.64041500  | -2.19377900 |
| C | 3.29824300  | 2.78472300  | -2.32630400 |
| C | 1.44729300  | 1.04583700  | -1.04597500 |
| H | 2.00115500  | -0.35385100 | -2.60016800 |
| C | 2.61866200  | 3.21422400  | -1.18851000 |
| H | 4.00697700  | 3.44191000  | -2.81799400 |
| C | 1.70118100  | 2.35757500  | -0.54887700 |
| H | 2.80719700  | 4.21175100  | -0.80401500 |
| C | 0.95243300  | 2.73116200  | 0.64736400  |
| C | 1.05333900  | 3.95030500  | 1.34113300  |
| C | -0.65996500 | 1.98856300  | 2.22016600  |
| C | 0.28892900  | 4.17850600  | 2.48100000  |
| H | 1.73776300  | 4.70899000  | 0.98486800  |
| C | -0.58579200 | 3.17907700  | 2.93199500  |

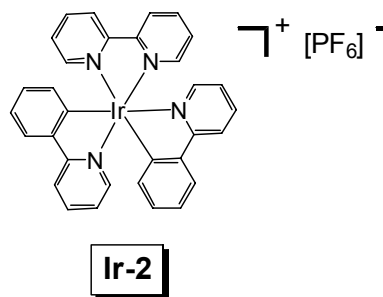

|    |             |             |             |
|----|-------------|-------------|-------------|
| H  | -1.31068000 | 1.18343500  | 2.53046000  |
| H  | 0.37310400  | 5.11786400  | 3.01565400  |
| H  | -1.19292900 | 3.31756900  | 3.81780900  |
| N  | 0.08371800  | 1.76309100  | 1.10664200  |
| C  | 3.06288800  | 1.49559100  | -2.82640200 |
| H  | 3.59602800  | 1.15522000  | -3.70903400 |
| Ir | 0.05023500  | 0.00223300  | -0.00102700 |
| N  | -1.72303300 | 0.76677600  | -1.03421900 |
| C  | 1.54359900  | -0.89440900 | 1.04853800  |
| N  | 0.26784900  | -1.74306300 | -1.10889500 |
| H  | -5.00379400 | -1.02162300 | 0.71818400  |
| H  | -5.08354200 | 0.49912700  | -0.71825000 |
